# Supplementary material
Source: Hindawi journal article supplement (doi:10.1155/2011/765378)

**Figure S2**

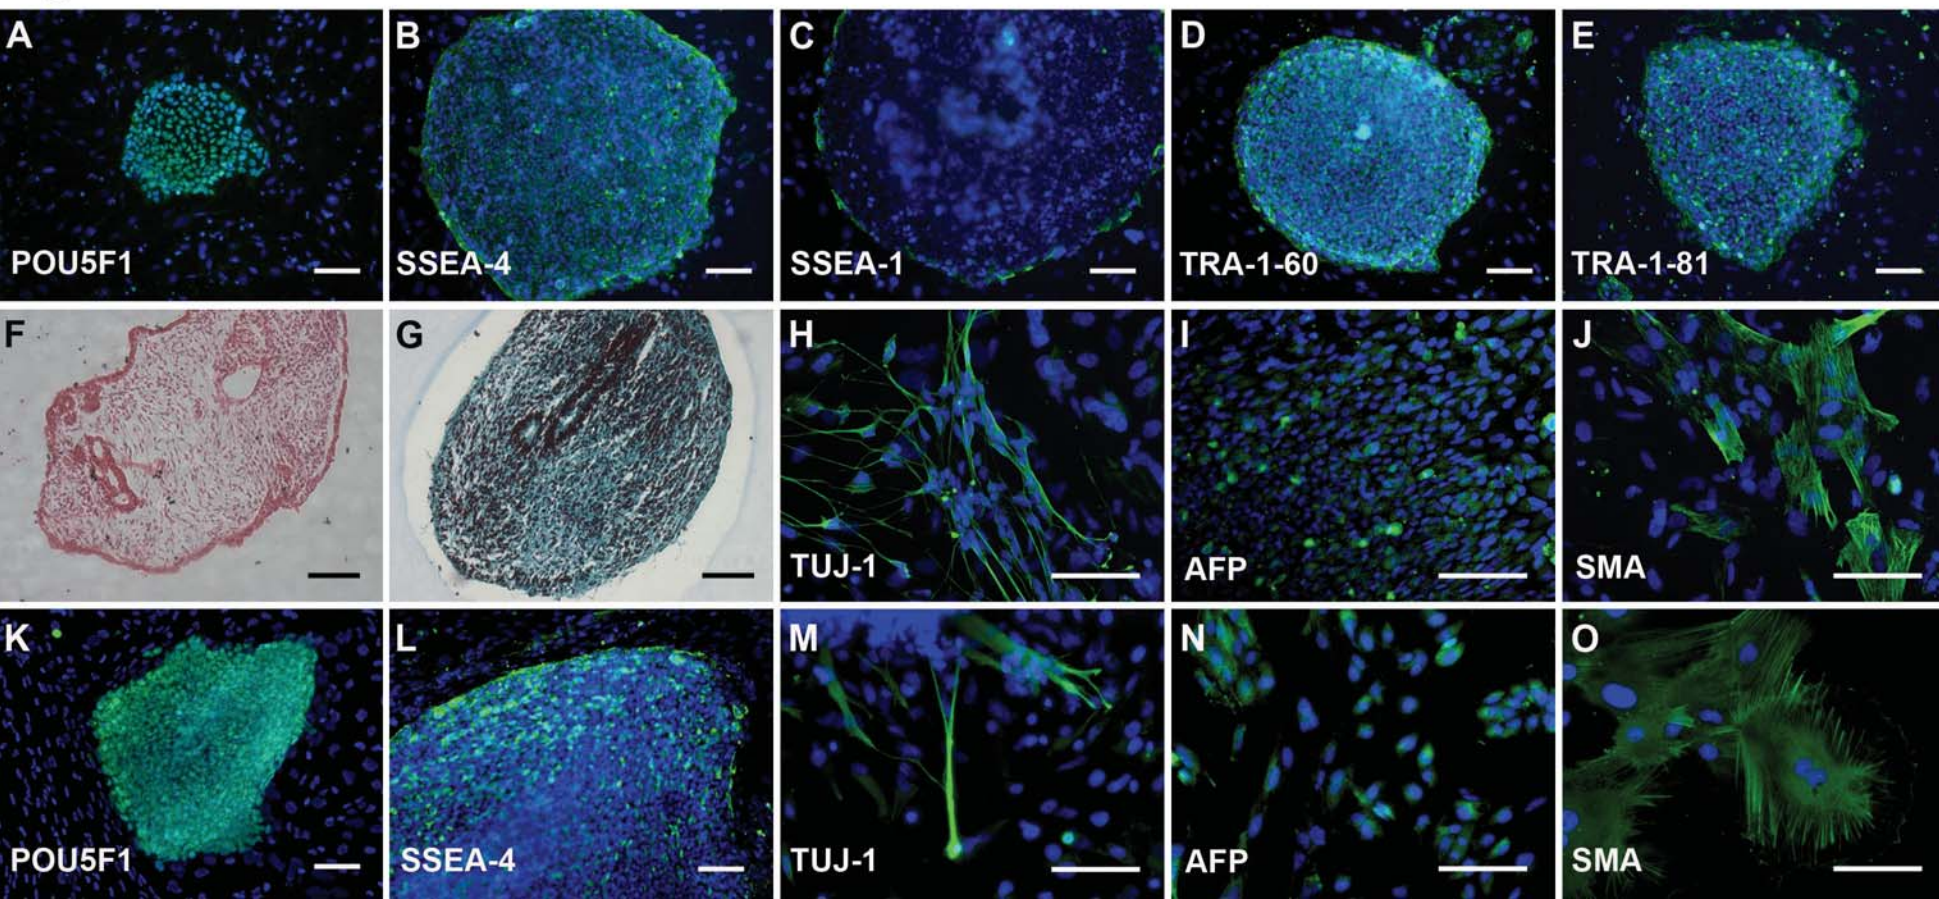

Supplement: f2 [file 765378.f2.pdf]
